# Supplementary material
Source: publisher site journal article supplement (http://static.cambridge.org/content/id/urn:cambridge.org:id:article:S0047279419000515/resource/name/S0047279419000515supp001.docx)
Supplement: Supplementary file 1 [file S0047279419000515supp001.docx]

**Table 4: country specific means and standard deviations1**

| Country | Overall ALMP | ALMP pes | ALMP training | ALMP employment | Regular EPL | Temporary EPL | UBs |  |  |  |  |  |  |  |
| --- | --- | --- | --- | --- | --- | --- | --- | --- | --- | --- | --- | --- | --- | --- |
|  | M | SD | M | SD | M | SD | M | SD | M | SD | M | SD | M | SD |
| Austria | 50.27 | 12.18 | 12.65 | 2.04 | 27.08 | 8.9 | 10.59 | 2.12 | 2.52 | 0.19 | 1.31 | 0 | 0.63 | 0.02 |
| Belgium | 31.7 | 5.06 | 7.87 | 1.51 | 6.25 | 0.8 | 17.27 | 4.19 | 1.82 | 0.08 | 2.52 | 0.58 | 0.67 | 0.02 |
| Czech Republic | 7.37 | 3.44 | 3.29 | 1.83 | 0.51 | 0.35 | 3.47 | 1.55 | 3.22 | 0.13 | 0.83 | 0.35 | 0.49 | 0.02 |
| Denmark | 113.4 | 18.65 | 17.66 | 6.38 | 40.34 | 9.16 | 55.46 | 9.49 | 2.14 | 0.02 | 1.38 | 0 | 0.59 | 0.05 |
| Estonia | 2.47 | 0.31 | 0.97 | 0.12 | 1.06 | 0.66 | 0.51 | 0.39 | 2.28 | 0.66 | 1.88 | 0 | 0.52 | 0 |
| Finland | 34.34 | 7.04 | 6 | 1.56 | 15.23 | 4.06 | 13.24 | 1.99 | 2.21 | 0.07 | 1.56 | 0 | 0.62 | 0.02 |
| France | 33.67 | 3.89 | 7.08 | 1.77 | 10.83 | 0.82 | 15.61 | 3.75 | 2.4 | 0.06 | 3.62 | 0 | 0.7 | 0.01 |
| Germany | 39.54 | 7.75 | 10.94 | 4.64 | 14.52 | 3.95 | 14.22 | 3.78 | 2.78 | 0.1 | 1.47 | 0.55 | 0.66 | 0 |
| Hungary | 9.17 | 1.95 | 2.26 | 0.39 | 1.41 | 0.35 | 5.38 | 1.21 | 2 | 0 | 1 | 0.25 | 0.54 | 0.04 |
| Ireland | 50.44 | 16.99 | 8.7 | 2.99 | 17.56 | 5.72 | 24.37 | 10.91 | 1.37 | 0.08 | 0.45 | 0.19 | 0.47 | 0.06 |
| Italy | 18.97 | 3.7 | 3.82 | 0.33 | 6.98 | 1.72 | 8.14 | 1.94 | 2.76 | 0 | 2 | 0 | 0.62 | 0.03 |
| Netherlands | 127.87 | 35.83 | 42.74 | 10.96 | 11.29 | 2.77 | 73.96 | 23.02 | 2.87 | 0.03 | 1 | 0.15 | 0.79 | 0.02 |
| Norway | 86.85 | 9.4 | 16.5 | 2.93 | 38.88 | 6.94 | 31.43 | 7.48 | 2.33 | 0 | 2.89 | 0.13 | 0.69 | 0 |
| Poland | 4.26 | 3.42 | 0.66 | 0.63 | 0.84 | 0.34 | 2.8 | 2.66 | 2.23 | 0 | 1.16 | 0.58 | 0.31 | 0.02 |
| Portugal | 18.83 | 6.16 | 4.32 | 1.27 | 7.43 | 1.65 | 7.15 | 3.81 | 4.46 | 0.15 | 2.51 | 0.37 | 0.78 | 0.01 |
| Slovak Republic | 3.3 | 1.23 | 1.55 | 0.45 | 0.13 | 0.09 | 1.6 | 0.94 | 2.31 | 0.12 | 1.19 | 0.43 | 0.57 | 0.03 |
| Slovenia | 16.35 | 1.99 | 4.05 | 0.31 | 3.8 | 0.54 | 8.5 | 1.76 | 2.65 | 0 | 1.81 | 0 | 0.71 | 0.01 |
| Spain | 16.88 | 6.26 | 2.48 | 1.15 | 3.67 | 1.14 | 10.69 | 4.15 | 2.35 | 0.04 | 3.14 | 0.2 | 0.76 | 0.01 |
| Sweden | 64.56 | 17.82 | 11.3 | 1.74 | 15.97 | 12.87 | 37.26 | 6 | 2.63 | 0.04 | 1.27 | 0.29 | 0.71 | 0.06 |
| United Kingdom | 19.59 | 7.08 | 16.14 | 7.19 | 1.54 | 0.59 | 1.73 | 0.52 | 1.16 | 0.07 | 0.32 | 0.06 | 0.29 | 0.01 |
| Country | Economic growth | GDP per capita (/10000) | Old age dependency ratio | | Crude net migration rate | Union density | | Coordination |  |  |  |  | |  |
|  | M | SD | M | | SD | M | | SD | M | SD | M | SD | | Mode |
| Austria | 1.71 | 1.87 | 3.36 | | 0.26 | 23.68 | | 1.26 | 3.39 | 1.95 | 33.36 | 3.88 | | 4 |
| Belgium | 1.46 | 1.74 | 3.17 | | 0.22 | 25.63 | | 0.58 | 3.65 | 2.11 | 54.45 | 1.14 | | 5 |
| Czech Republic | 2.98 | 3.15 | 2.1 | | 0.29 | 19.97 | | 0.38 | 2.36 | 3.14 | 21.15 | 4.18 | | 2 |
| Denmark | 0.99 | 2.28 | 3.27 | | 0.19 | 22.82 | | 0.81 | 2.32 | 1 | 70.64 | 3.21 | | 4 |
| Estonia | -5.95 | 12.18 | 1.75 | | 0.19 | 25.25 | | 0.07 | 0.05 | 0.07 | 7.73 | 0.03 | | 1 |
| Finland | 2.21 | 3.48 | 3.05 | | 0.31 | 23.38 | | 1.32 | 1.58 | 0.83 | 72.16 | 2.9 | | 5 |
| France | 1.23 | 1.66 | 2.94 | | 0.17 | 24.61 | | 0.73 | 1.77 | 1.35 | 7.84 | 0.24 | | 2 |
| Germany | 1.46 | 2.37 | 3.2 | | 0.19 | 26.53 | | 3.13 | 1.39 | 1.22 | 22.15 | 2.87 | | 4 |
| Hungary | 2.54 | 1.96 | 1.66 | | 0.2 | 22.68 | | 0.51 | 1.73 | 0.3 | 16.78 | 2.48 | | 2 |
| Ireland | 2.88 | 4.69 | 3.58 | | 0.51 | 16.59 | | 0.54 | 6.31 | 6.77 | 35.2 | 3.58 | | 5 |
| Italy | -0.51 | 2.67 | 2.93 | | 0.09 | 30 | | 0.7 | 6.71 | 1.76 | 34.69 | 1.15 | | 3 |
| Netherlands | 1.7 | 2.18 | 3.63 | | 0.28 | 20.68 | | 1.01 | 1.37 | 1.67 | 21.19 | 1.8 | | 4 |
| Norway | 0.58 | 1.72 | 4.67 | | 0.17 | 22.6 | | 0.46 | 5.13 | 2.85 | 53.99 | 0.81 | | 4 |
| Poland | 4.02 | 1.96 | 1.27 | | 0.17 | 18.15 | | 0.61 | -0.42 | 0.18 | 17.32 | 2.24 | | 1 |
| Portugal | 1.18 | 2.11 | 2.16 | | 0.12 | 24.55 | | 1.36 | 3.42 | 1.96 | 21.3 | 1.64 | | 2 |
| Slovak Republic | 4.12 | 4.15 | 1.59 | | 0.3 | 16.48 | | 0.15 | 0.19 | 1.41 | 23.71 | 6.44 | | 3 |
| Slovenia | -3.91 | 6.76 | 2.64 | | 0.17 | 23.45 | | 0.21 | 7.4 | 2.55 | 25.65 | 0.89 | | 4 |
| Spain | 1.49 | 2.32 | 2.63 | | 0.22 | 24.2 | | 0.59 | 9.02 | 5.71 | 16.36 | 1.14 | | 4 |
| Sweden | 2.25 | 2.81 | 3.22 | | 0.34 | 26.88 | | 0.43 | 3.47 | 2.01 | 75.55 | 5.11 | | 4 |
| United Kingdom | 1.63 | 2.24 | 3.21 | | 0.29 | 24.35 | | 0.13 | 2.62 | 0.92 | 28.7 | 1.65 | | 1 |

1The regression analysis is based on a fixed effect technique that focuses on within-country differences.
